# Supplementary material for: Display of the human mucinome with defined O-glycans by gene engineered cells
Source: PubMed Central journal article supplement (PMC8249670; doi:10.1038/s41467-021-24366-4), 2021-07-01
Supplement: 41467_2021_24366_MOESM1_ESM.pdf [file 41467_2021_24366_MOESM1_ESM.pdf]

## Supplementary Information

### Display of the Human Mucinome with Defined O-Glycans by Gene Engineered Cells

Rebecca Nason<sup>1</sup>, Christian Büll<sup>1</sup>, Andriana Konstantinidi<sup>1</sup>, Lingbo Sun<sup>1</sup>, Zilu Ye<sup>1</sup>, Adnan Halim<sup>1</sup>, Wenjuan Du<sup>2</sup>, Daniel M. Sørensen<sup>1</sup>, Fabien Durbesson<sup>3</sup>, Sanae Furukawa<sup>1</sup>, Ulla Mandel<sup>1</sup>, Hiren J. Joshi<sup>1</sup>, Leo Alexander Dworkin<sup>1</sup>, Lars Hansen<sup>1</sup>, Leonor David<sup>4,5</sup>, Tina M. Iverson<sup>6</sup>, Barbara A. Bensing<sup>7</sup>, Paul M. Sullam<sup>7</sup>, Ajit Varki<sup>8</sup>, Erik de Vries<sup>2</sup>, Cornelis A.M. de Haan<sup>2</sup>, Renaud Vincentelli<sup>3</sup>, Bernard Henrissat<sup>1,3,9</sup>, Sergey Y. Vakhrushev<sup>1</sup>, Henrik Clausen<sup>1\*</sup>, Yoshiki Narimatsu<sup>1,10\*</sup>

- <sup>1</sup> Copenhagen Center for Glycomics, Departments of Cellular and Molecular Medicine and School of Dentistry, Faculty of Health Sciences, University of Copenhagen, Blegdamsvej 3, Copenhagen, Denmark
- <sup>2</sup> Section Virology, Division of Infectious Diseases and Immunology, Department Biomolecular Health Sciences, Faculty of Veterinary Medicine, Utrecht University, Yalelaan 1, 3584 CL Utrecht, the Netherlands
- <sup>3</sup> Architecture et Fonction des Macromolécules Biologiques, CNRS, Aix-Marseille Université, Marseille, France
- <sup>4</sup> Institute of Molecular Pathology and Immunology of the University of Porto/I35, 4200-465 Porto, Portugal
- <sup>5</sup> Medical Faculty of the University of Porto, Rua Dr. Roberto Frias, 4200-319, Porto, Portugal
- <sup>6</sup> Departments of Pharmacology and Biochemistry, Vanderbilt University, Nashville, TN 37232
- <sup>7</sup> Department of Medicine, The San Francisco Veterans Affairs Medical Center, and the University of California, San Francisco, CA 94121, USA
- <sup>8</sup> The Glycobiology Research and Training Center, and the Department of Cellular and Molecular Medicine, University of California, San Diego, CA 92093, USA
- <sup>9</sup> Department of Biological Sciences, King Abdulaziz University, Jeddah, Saudi Arabia
- <sup>10</sup> GlycoDisplay ApS, Copenhagen, Denmark

**Supplementary Figure 1.** Design of the human mucin TR reporters. **a** Schematic presentation of the imperfect TR amino acid sequences selected. **b** Parallel plot of key amino acid residues in the human mucin TR reporter designs.

**Supplementary Figure 2.** Validation of mucin TR and O-glycoform expression.

**Supplementary Figure 3.** Production of secreted mucin reporter proteins.

**Supplementary Figure 4.** Immunochemical ELISA analysis of glycoengineered MUC1 and MUC7 TR reporters.

**Supplementary Figure 5.** HPLC isolation of MUC1 TR O-glycodomains for intact mass analysis.

**Supplementary Figure 6.** MS analysis of MUC1 TR expressed in GALNT4 KO engineered HEK293<sup>KO COSMC</sup> cells.

**Supplementary Figure 7.** MALDI-TOF profiling of released MUC1 TR O-glycans.

**Supplementary Figure 8.** Mucin display reveals binding specificities of *Streptococcus* adhesins.

**Supplementary Figure 9.** Analysis of StcE on secreted and membrane-bound mucin TR reporters.

**Supplementary Figure 10.** The StcE X409 domain binds mucins *in situ*.

**Supplementary Table 1.** Amino acid sequences of mucin TR reporter constructs used, related to Figure 1 and supplementary Figure 1.

**Supplementary Table 2.** Summary of engineered HEK293 isogenic cell library generated to date, related to Figure 1.

**Supplementary Table 3.** List of CRISPR gRNA design and PCR primers used in this study.

**Supplementary Table 4.** A peak list of intact mass spectra.

**Supplementary Table 5.** A peak list of intact mass spectra of experimentally determined (MW cal) masses related to Figure 3.

**Supplementary Table 6.** A peak list of intact mass spectra experimentally determined (MW ex) and theoretically calculated (MW cal) masses related to Supplementary Figure 7a.

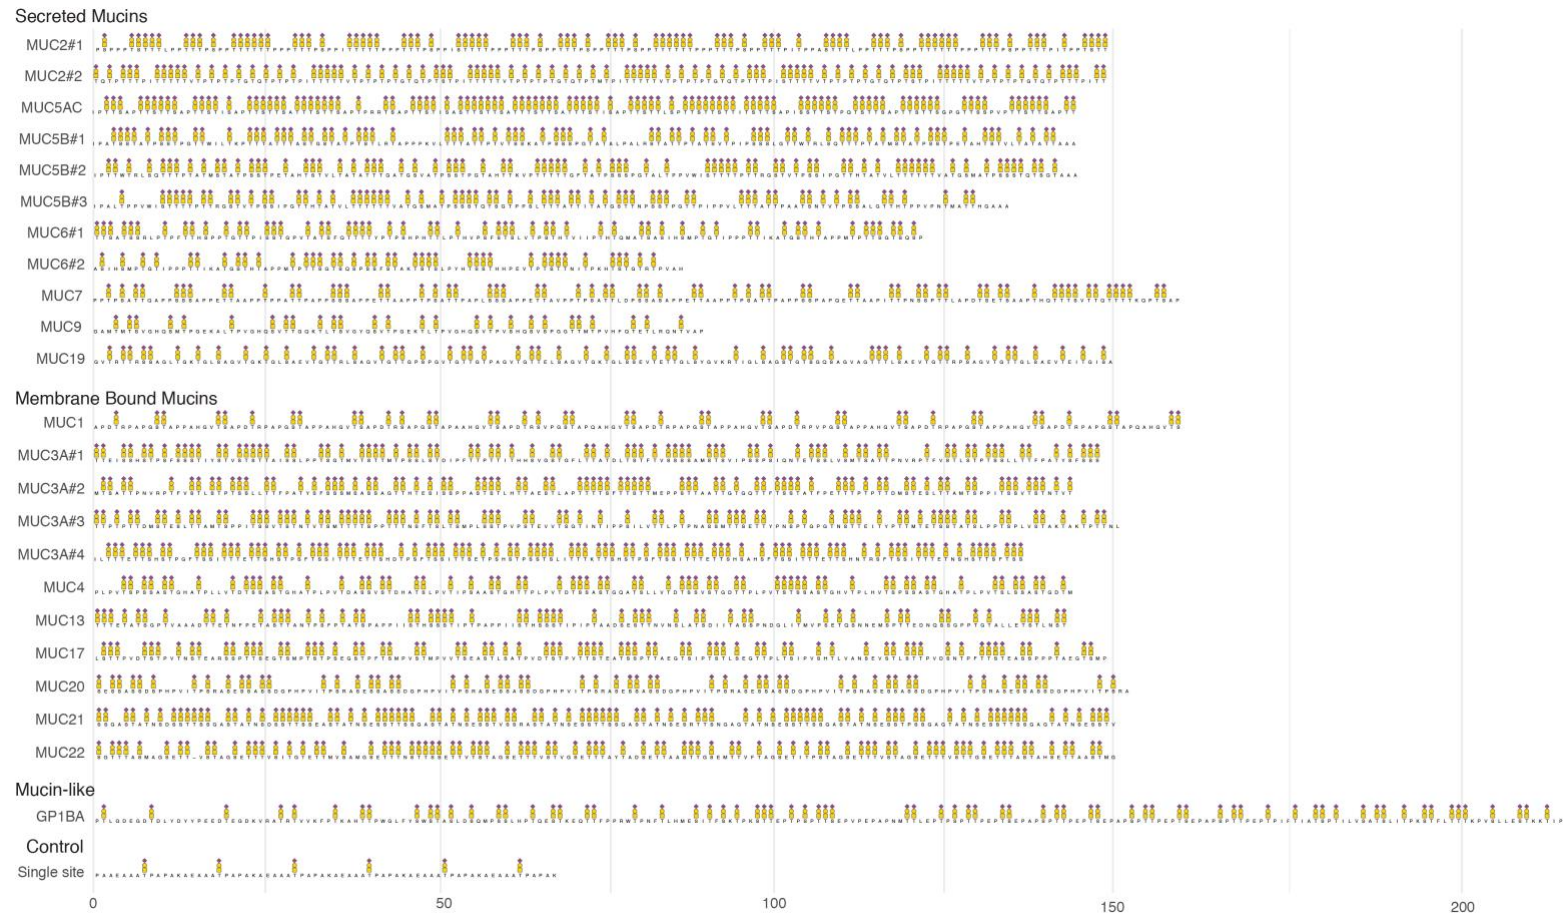

**Supplementary Fig. 1a Design of the human mucin TR reporters.** Schematic presentation of the imperfect TR amino acid sequences selected for design of the human mucin TR reporters. All Ser/Thr residues are highlighted as potential O-glycosites by glycan symbols (mStA O-glycans shown for simplicity) to illustrate the characteristic patterning generated with all Ser/Thr residues O-glycosylated.



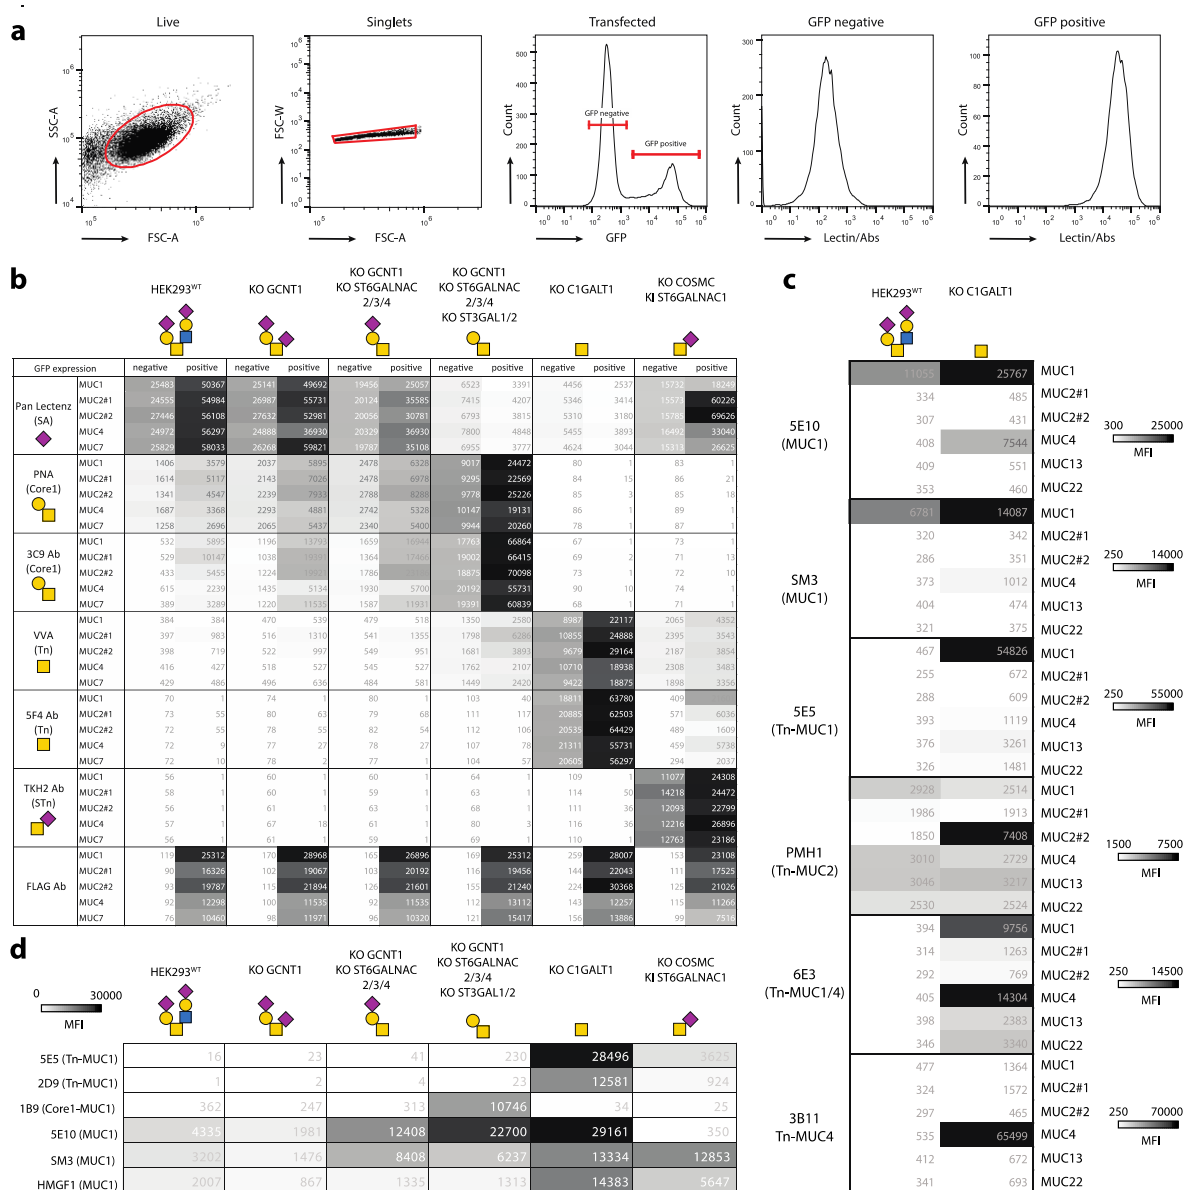

**Supplementary Fig. 2 Validation of mucin TR and O-glycoform expression.** Analysis of O-glycosylation of the mucin TR reporters expressed in glycoengineered HEK293 cells with antibodies and lectins. **a** Gating strategy to measure lectin or monoclonal antibody binding to HEK293 cells transiently expressing transmembrane mucin-GFP reporters. Live cells were gated on in the side scatter area (SSC-A) versus forward scatter area (FSC-A) plot followed by gating on singlets and cells expressing mucin-GFP reporter (GFP positive) or not expressing mucin-GFP reporter (GFP negative). **b** Flow cytometry analysis of binding of lectins and anti-carbohydrate mAbs to engineered HEK293 cells transiently expressing membrane-bound mucin TR reporters (GFP and FLAG-tagged) as indicated. Primary specificities illustrated with glycan symbols. GFP negative cells (non-transfected) or GFP positive cells (transfected) were analyzed by flow cytometry and mean fluorescent intensity (MFI) values presented as heat map. Surface expression of mucin TR reporters was confirmed by anti-FLAG antibody labelling. **c** Flow cytometry analysis of binding of mucin-specific mAbs to HEK293<sup>WT</sup> and HEK293<sup>KO C1GALT1</sup> cells transiently expressing mucin TR reporters. **d** Flow cytometry analysis of binding of MUC1 glycoform-specific mAbs to glycoengineered HEK293 cells stably expressing the MUC1 TR reporter. MFI values from representative experiments are shown (greytones indicate high to low MFI values). Source data are provided as a Source Data file.

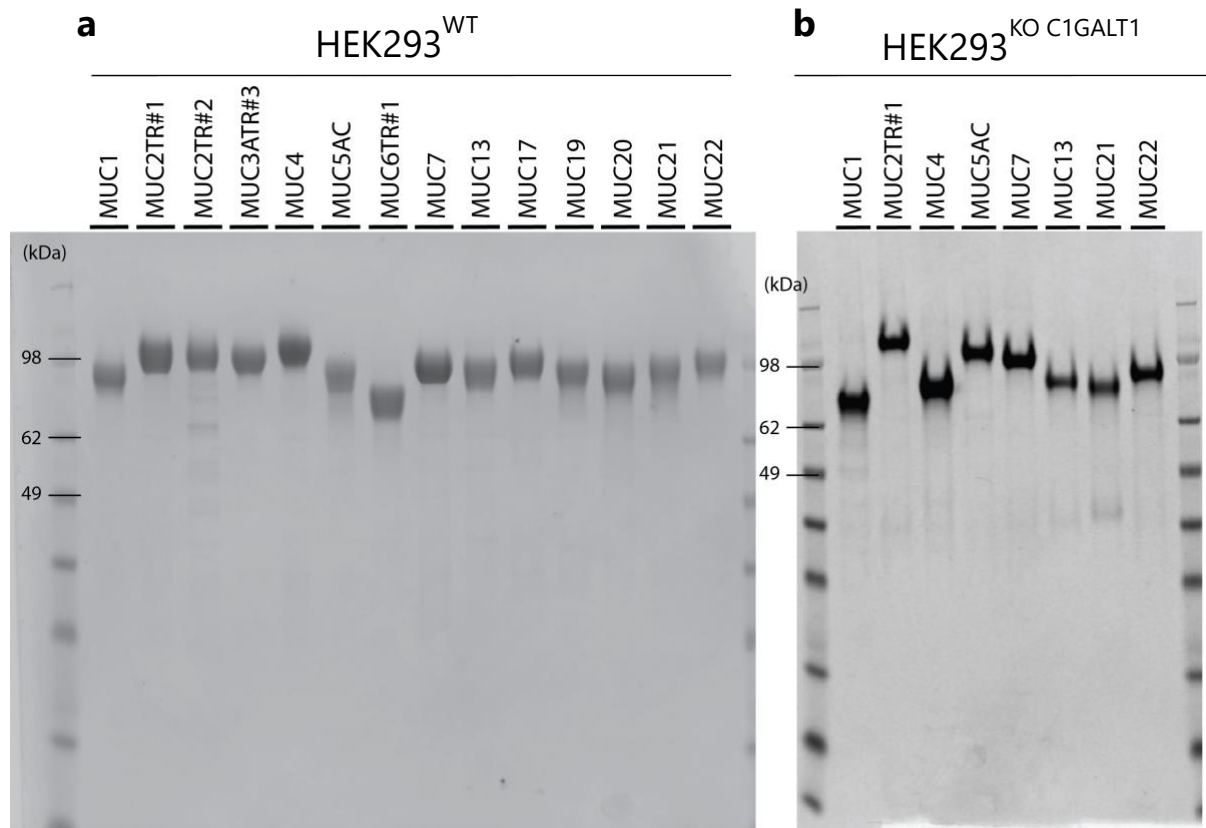

**Supplementary Fig. 3 Production of secreted mucin reporter proteins.** SDS-PAGE Coomassie analysis of purified secreted mucin TR reporters. **a** Analysis of TR reporters expressed in HEK293<sup>WT</sup> with heterogeneous core1/2 O-glycans. **b** Analysis of TR reporters expressed in HEK293<sup>KO C1GALT1</sup> with homogenous Tn O-glycans. SDS-PAGE analysis in **a** and **b** were repeated two times with similar results.

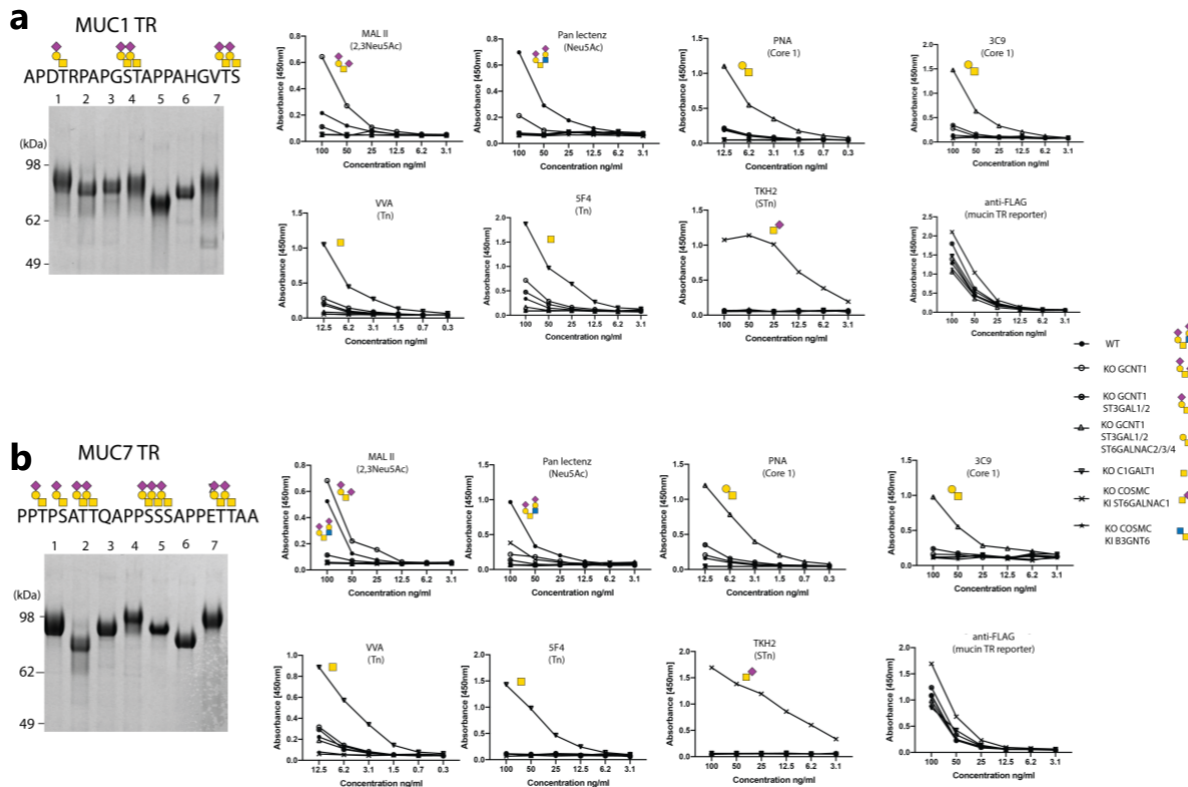

**Supplementary Fig. 4 Immunochemical ELISA analysis of glycoengineered MUC1 and MUC7 TR reporters.**

ELISA analysis of purified secreted MUC1 and MUC7 TR reporters produced in glycoengineered HEK293 cells. **a** SDS-PAGE analysis of MUC1 TR reporters (left) and corresponding ELISA antigen titrations with lectins and anti-carbohydrate mAbs (right) as indicated. Anti-Flag mAb was included to evaluate comparable coating efficiencies. **b** The same analysis with MUC7 TR reporters. Samples loaded for SDS-PAGE analysis corresponded to symbol key (top-to low illustrated right) as follows: Lane 1 HEK293<sup>WT</sup>, lane 2 HEK293<sup>KO GCNT1</sup>, lane 3 HEK293<sup>KO GCNT1/ST3GAL1/2</sup>, lane 4 HEK293<sup>KO GCNT1/ST3GAL1/2 ST6GALNAC2,3,4</sup>, lane 5 HEK293<sup>KO C1GALT1</sup>, lane 6 HEK293<sup>KO COSMC KI ST6GALNAC1</sup>, lane 7 HEK293<sup>KO COSMC KI B3GNT6</sup>. SDS-PAGE analysis in left panel **a** and **b** were repeated two times with similar results. Source data are provided as a Source Data file.

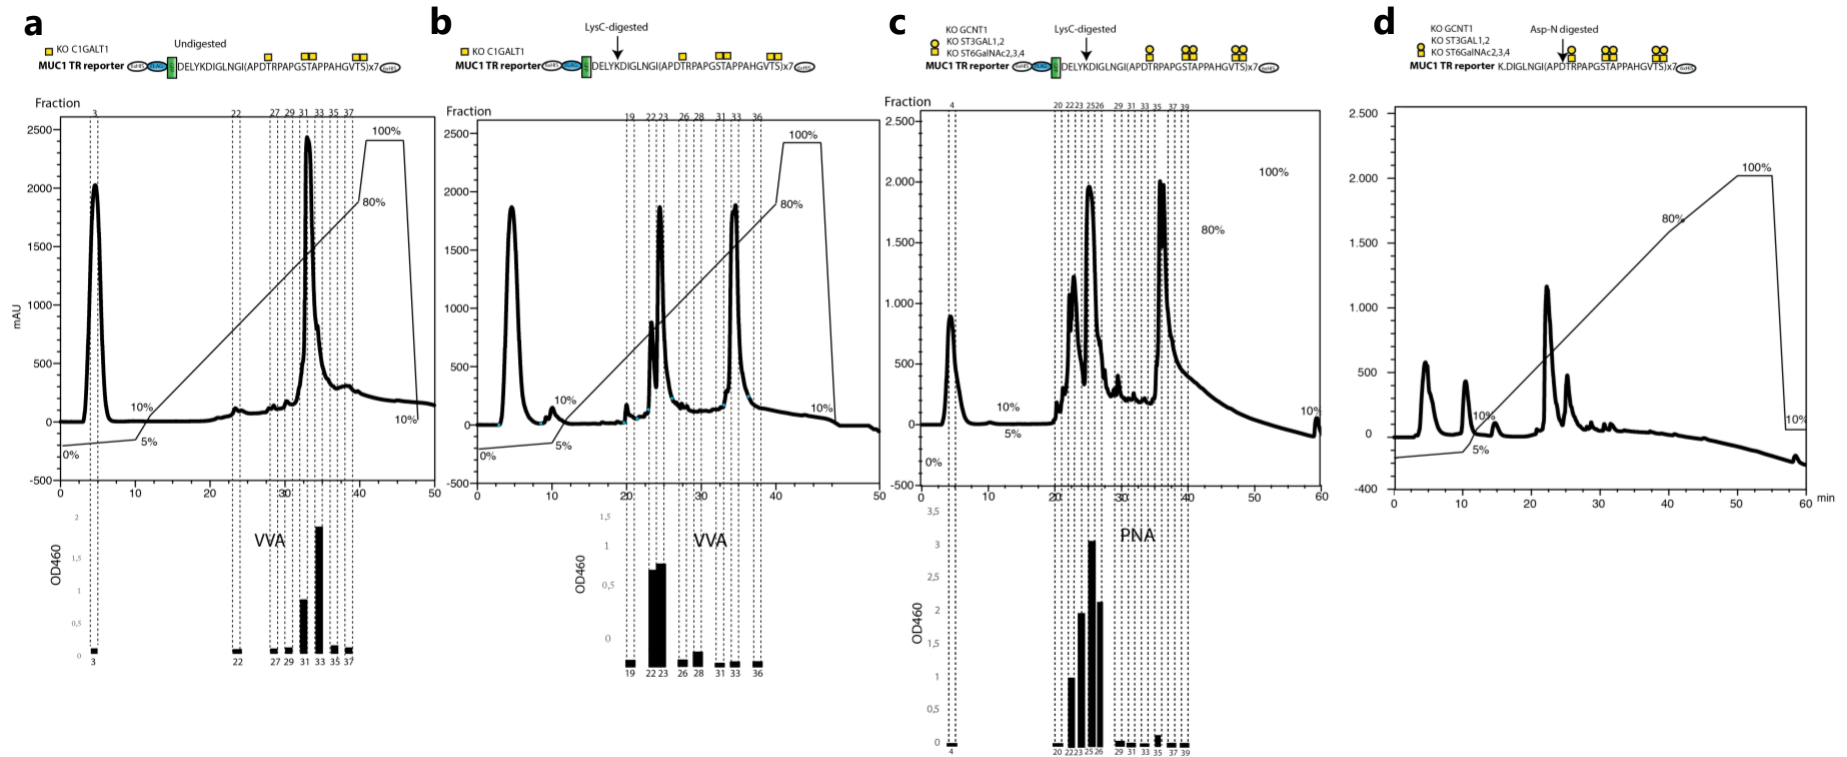

**Supplementary Fig. 5 HPLC isolation of MUC1 TR O-glycosylated reporter for intact mass analysis.** **a** C4 HPLC isolation of the undigested Tn-glycosylated MUC1 TR reporter with GFP expressed in HEK293<sup>KO C1GALT1</sup> cells. **b** C8 HPLC separation of the corresponding LysC digested TR reporter with the O-glycosylated domain eluting in fractions 22-23 and the intact GFP module in fraction 33 as verified by VVA lectin ELISA. **c** C4-HPLC of LysC digested T-MUC1 with the O-glycosylated domain eluting in fractions 22-26 and the intact GFP module in fraction 35 as verified by PNA lectin ELISA, and **d** further digested by AspN. The intact GFP-tagged reporter eluted at ~60% acetonitrile, while the released TR O-glycosylated domains eluted at ~35% and the digested GFP-tag at ~55%. HPLC data was collected and analyzed with Empower 3 Chromatography Data Software (Waters) and Chromeleon™ 6.8 Chromatography Data System Software (Thermo). Source data are provided as a Source Data file.



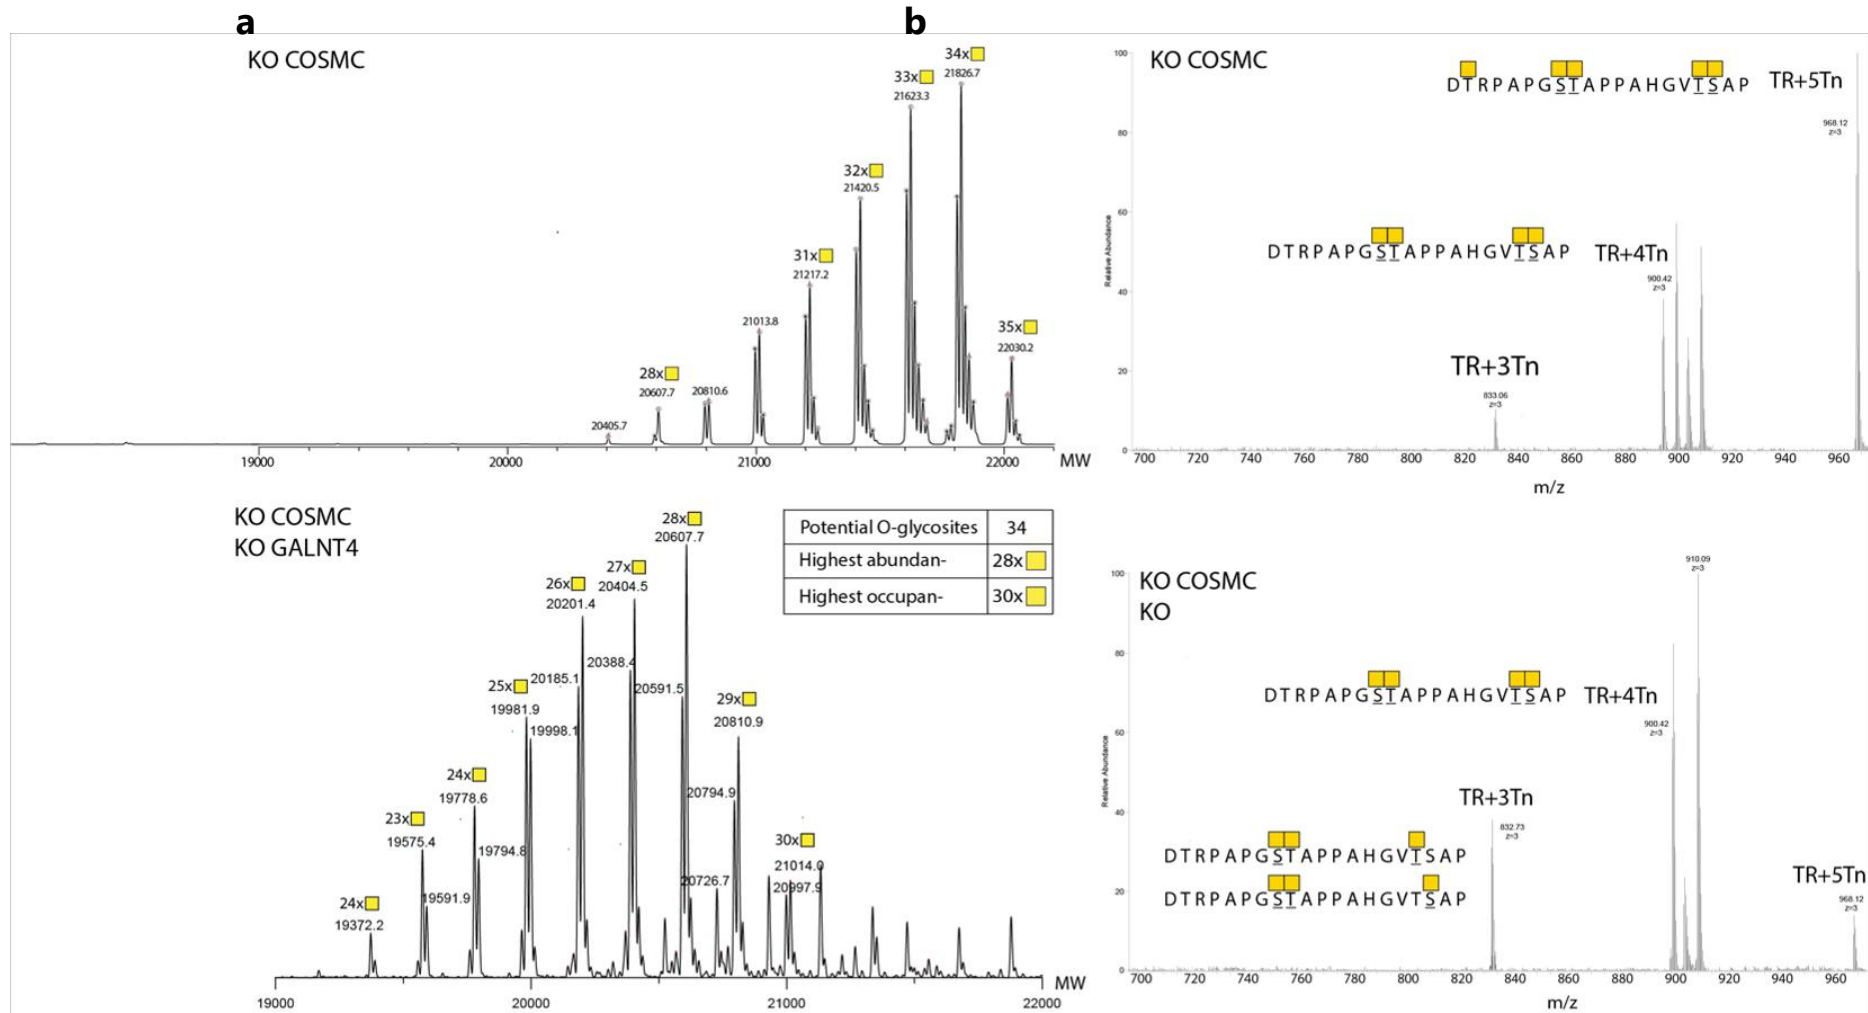

**Supplementary Fig. 6 MS analysis of MUC1 TR expressed in GALNT4 KO engineered HEK293<sup>KO COSMC</sup> cells. a** Deconvoluted intact mass spectra of MUC1 TR O-glycodomains isolated from reporters expressed in HEK293<sup>KO COSMC</sup> (top) and HEK293<sup>KO COSMC/GALNT4</sup> (bottom). **b** Depiction of the three most abundant MUC1-TR glycopeptide precursors applied to MS/MS ETD with identified O-glycosites and predicted O-glycan structures illustrated. MS2 analysis showed that KO of *GALNT4* selectively resulted in loss of O-glycosylation at the glycosite in the PDTRP motif. For all intact mass spectra the experimentally determined and theoretically calculated masses are composed in a separate supplementary table 6.

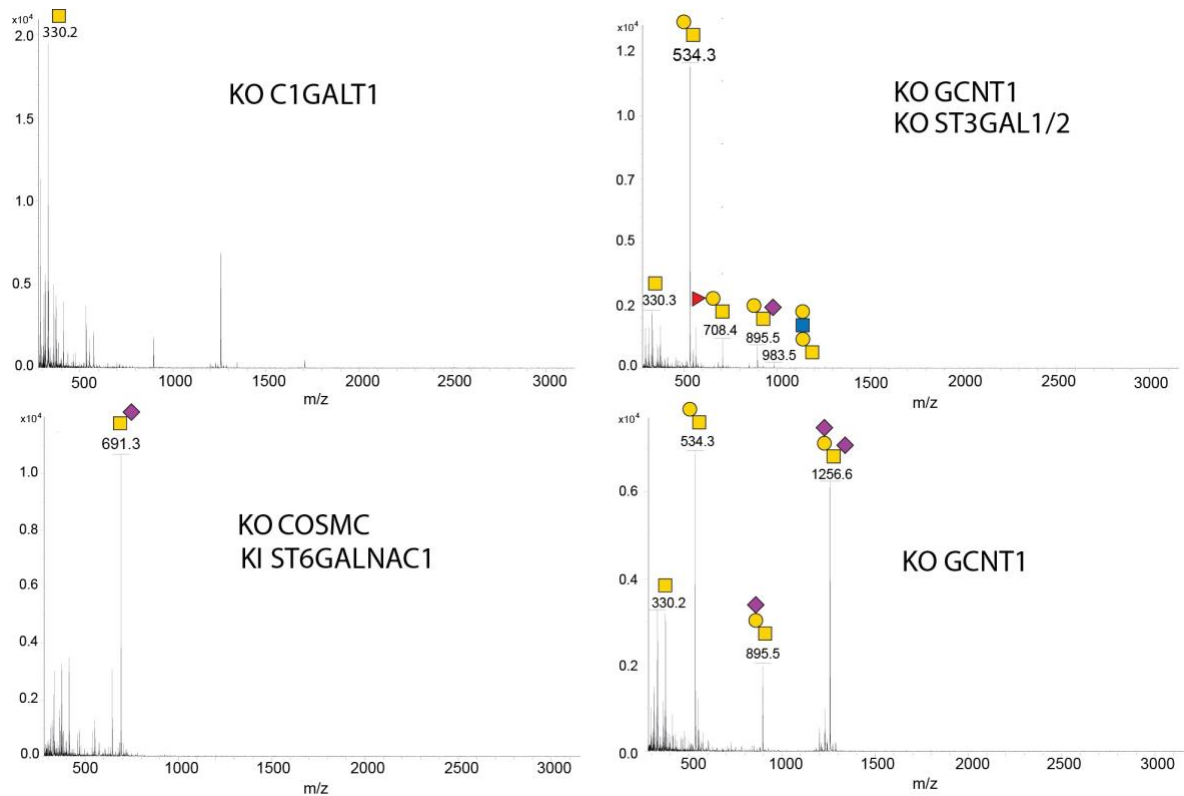

**Supplementary Fig. 7 MALDI-TOF profiling of released MUC1 TR O-glycans.** MS spectra of O-glycoprofiling of purified mucin TRs produced in HEK293<sup>KO C1GALT1</sup>, HEK293<sup>KO COSMC, KI ST6GALNAC1</sup>, HEK293<sup>KO GCNT1, ST3GAL1/2</sup> and HEK293<sup>KO GCNT1</sup> cells.

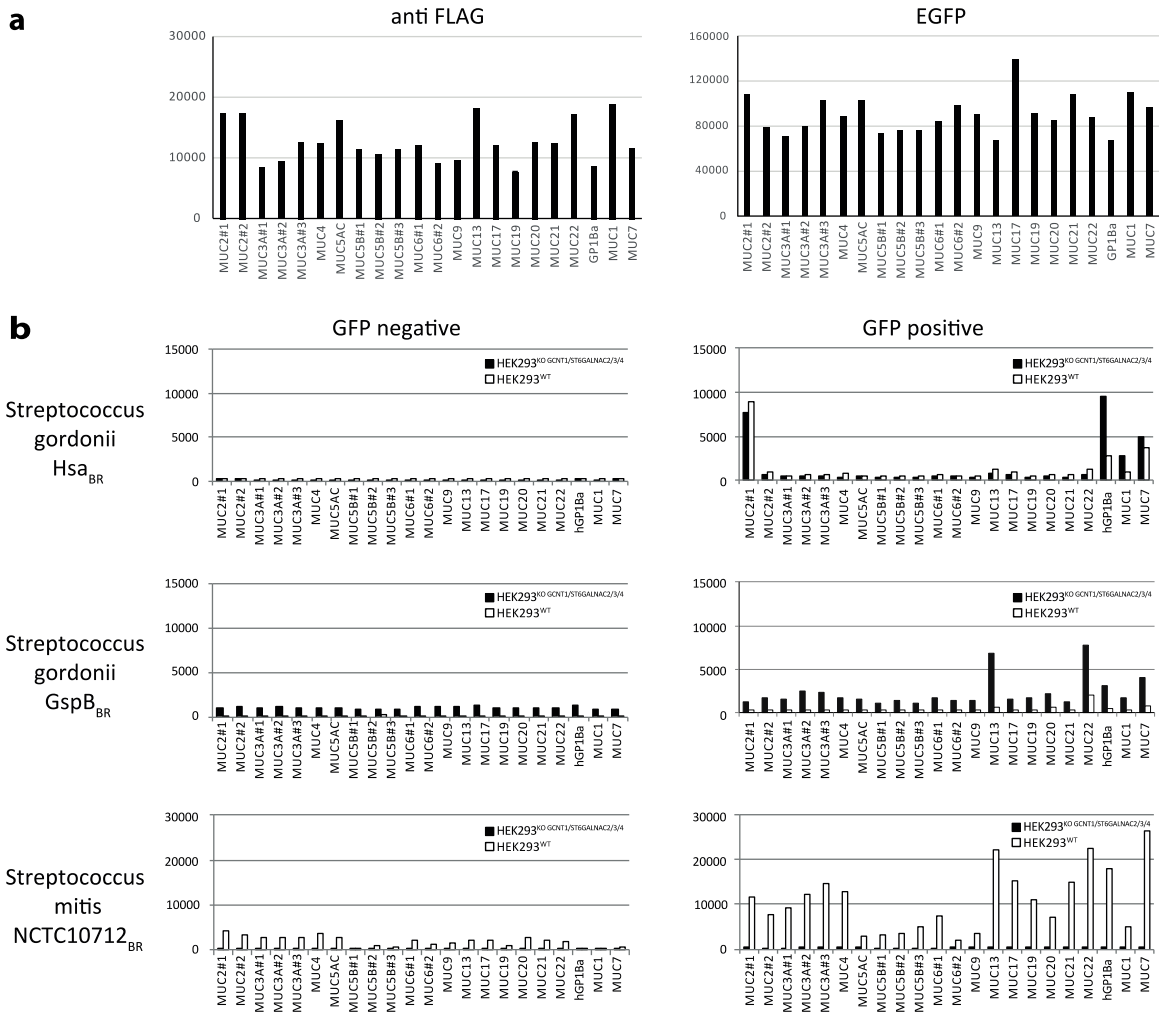

**Supplementary Fig. 8 The cell-based mucin display reveals binding specificities of *Streptococcus* adhesins. **a** Flow cytometry analysis of surface expression of mucin TR reporters transiently expressed with anti-FLAG mAb and correlation with GFP expression. **b** Bar diagrams showing binding of Siglec-like adhesins from *S. gordonii* (Hsa<sub>BR</sub> and Gsp<sub>BR</sub>) and *S. mitis* (NCTC10712<sub>BR</sub>) to HEK293<sup>WT</sup> and HEK293<sup>KO</sup> *GCNT1/ST6GALNAC2/3/4* cells transiently expressing membrane bound mucin TR reporters with GFP. GFP negative (left) and positive (right) cell populations without subtraction are shown. Mean fluorescence intensity (MFI). Representative data of two independent experiments. Source data are provided as a Source Data file.**

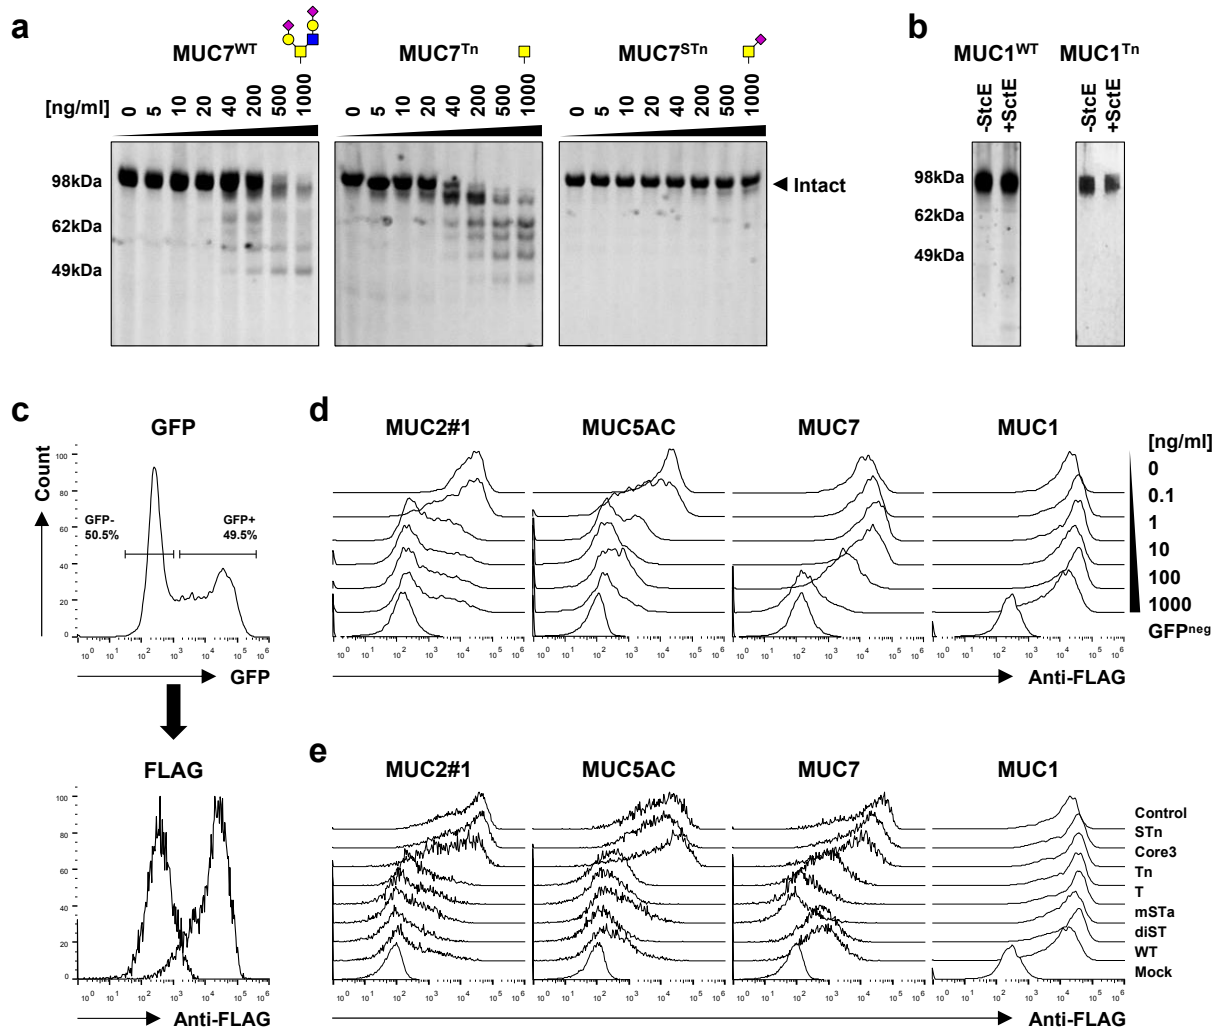

**Supplementary Fig. 9 Analysis of StcE on secreted and membrane-bound mucin TR reporters.** **a** SDS-PAGE analysis of StcE (dose titration) digestion of secreted purified MUC7 TR reporters with different glycoforms. **b** SDS-PAGE analysis of StcE digestion of MUC1 TR reporters with 1:10 ratio enzyme to substrate of core2 and Tn glycoforms. **c** Flow cytometry analysis of membrane bound reporters illustrating the gating strategy for transiently expressed GFP-tagged mucin TR reporters in HEK293 cells. Gating for GFP positive cells correlates well with the population of cells labelled by the anti-FLAG mAb detecting surface located mucin TR reporters. **d** Representative histograms of membrane MUC2#1, MUC5AC, MUC7 and MUC1 TR reporters expressed in HEK293<sup>WT</sup> cells by increasing concentrations of StcE as determined by staining with anti-FLAG mAb. **e** Representative histograms show StcE-mediated cleavage of MUC2#1, MUC5AC, MUC7 and MUC1 TR reporters expressed by HEK293 cells with core2, diST, mSTa, T, Tn, core3 or STn glycosylation. Mock transfected cells and transfected, untreated cells are shown as control. SDS-PAGE analysis in **a** and **b** were repeated with two times with similar results. Source data are provided as a Source Data file.

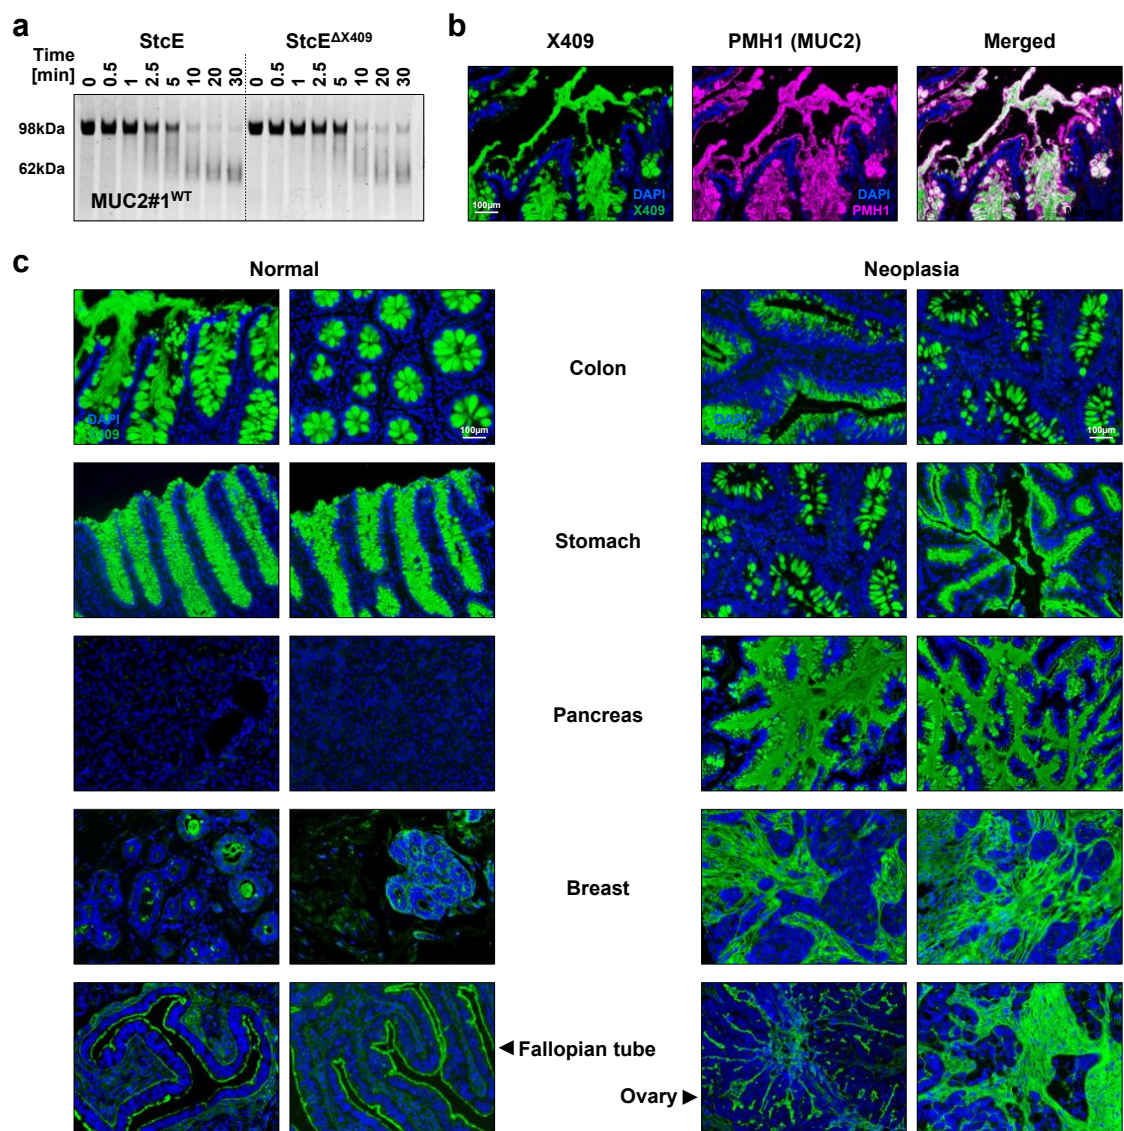

**Supplementary Fig. 10 The StcE X409 domain binds mucins *in situ*.** **a** SDS-PAGE analysis of StcE and StcE $\Delta$ X409 digestion (time course 1:200 ratio) of the MUC2#1 TR reporter expressed in HEK293<sup>WT</sup>. **b** Representative fluorescence images of sections from normal colon (pretreated with neuraminidase) reacted with X409-GFP and anti-Tn-MUC2 (PMH1) mAb. **c** Images of normal and neoplastic tissue microarray sections reacted with X409-GFP. SDS-PAGE analysis in **a** was repeated multiple times with similar results. Source data are provided as a Source Data file.

**Supplementary Table 1.** Amino acid sequences of mucin TR reporter constructs used, related to **Figure 1** and **Supplementary Figure 1**.

| Gene (HGNC)  | Uniprot ID | Position in UniProt ID | length (aa) | Sequence                                                                                                                                                                                                                        |                                                                                                                                                               |
|--------------|------------|------------------------|-------------|---------------------------------------------------------------------------------------------------------------------------------------------------------------------------------------------------------------------------------|---------------------------------------------------------------------------------------------------------------------------------------------------------------|
| MUC1         | P15941     | 121-260                | 140         | APDNKPAPGSTAPPAHGVTS APDTRPAPGSTAPPAHGVTS APDTRPAPGSTAPPAHGVTS APDTRPAPGSTAPPAHGVTS APDTRPAPGSTAPPAHGVTS APDTRPAPGSTAPPAHGVTS APDTRPAPGSTAPPAHGVTS                                                                              |                                                                                                                                                               |
| MUC2         | Q02817     | #1                     | 1406-1554   | 152                                                                                                                                                                                                                             | PSPPTST TTLPPTT PSPPTTT TTPPPTT SPPIITT TTPPPTT SPPIISTT TTPPPTT PSPPTT<br>PS PPTT PSPPTTT TTPPPTT PS PPTT PITPPAST TTLPPTT PSPPTTT TTPPPTT PSPPTT PITPPTST T |
|              |            | #2                     | 1916-2064   | 152                                                                                                                                                                                                                             | PTQTPTTPIITTTTVPTPTPT GTQTPTPTITTTTVPTPTPT GTQTPTSTPIITTTTVPTPTPT GTQTPTMTPIITTTTVPTPTPT<br>GTQTPTTPISTTTTVPTPTPT GTQTPTSTPIITTTTVPTPTPT GTQTPTTPIITAA        |
| MUC3A        | Q02505     | #1                     | 391-538     | 148                                                                                                                                                                                                                             | TTEISSHSTPSFSSSTIYSTVSTT AISSLPPTSGTMVSTTMT PSSLSTDIPTTPTTITHHVSFGSTGFLTTATDLTSTFTVSSSSAMSTSVIPSSPQNTETSSLVSMSTATTNVRPTFVSTLSTPTSLLTTFPATYSFSS                |
|              |            | #2                     | 502-645     | 144                                                                                                                                                                                                                             | MTSATTNVRPTFVSTLSTPTSLLTTFPATYSFSSMSASSAGTTHTESISSPPASTSLHTAEELAPITTTSTFTSTMEPPSTAAATTGQTTFTSSTATFPETTTPTTDMSTESLTTAMTSPITSSVTSTNTVT                          |
|              |            | #3                     | 612-762     | 151                                                                                                                                                                                                                             | TTPTPTDMSTESLTTAMTSPITSSVTSTNTVTSMTTTTSPPTTNSFTSLTSMPLSSTPVSTEVVSTGINTIPPILVTLTPNASSMTTSETTYPNSTGPGTNPSTTEIYPTTMTETSSTATSLPPTSPLVSTAKTAKTPTTNL                |
|              |            | #4                     | 2227-2361   | 135                                                                                                                                                                                                                             | TTTETTSHTSPGFTSS ITTETTSHTSPSFTSS ITTETTSHDTPSFTSS ITTSETPSHSTPSSTSL<br>ITTTKTTSHSTPSFTSS ITTETTSHTSHSFTSS ITTETTSHNRSFTSS ITTETNSHSTTSFTSS                   |
| MUC4         | E9PDY6     | 1184-1327              | TQT         | PLPVTSPSSASTGHAT PLLVDTSSASTGHAT PLPVDASSVSTDHAT SLPVTIPSAASTGHATT PLPVDTSASTGQAT<br>SLLVDTSSVSTGDTT PLPVTSSASTGHVT PLHVTSPSSASTGHAT PLPVTSLSASTGDTM                                                                            |                                                                                                                                                               |
| MUC5AC       | P98088     | 2708-2850              | 142         | TTSAPTT STTSAPTT STISAPTT STTSATTT STTSAPTT RRTSAPTT STISASTT STTSATTT STTSATTT<br>STISAPTT STLSPTT STSTITIT STTSAPIS STTSTPQT STTSAPTT STTSGPGT TSSVPPTT STTSAPTT                                                              |                                                                                                                                                               |
| MUC5B        | Q9HC84     | #1                     | 1889-2029   | 141                                                                                                                                                                                                                             | PATSSATPSSTPGTTWILTKPTTATTTASTGSTATPTSLRTPAPPKVLTTTATPTVTSKATPSSSPGATATLALPALRSTATTPTATSVTPIPSSSLGTTWTRLSQTTTPTATMSTATPSSPETAHSTVLTATATT                      |
|              |            | #2                     | 1990-2129   | 140                                                                                                                                                                                                                             | TTWTRLSQTTTPTATMSTATPSSPETAHSTVLTATATTGATGVSATPSSTPGTAHTTKVPTTTTGTGATPSSSPGALTTPPVWISTTTTPTTRGSTVTPSSIPGTTHTATVLTITTTTATGSMATPSSSTQTSQT                       |
|              |            | #3                     | 2070-2199   | 130                                                                                                                                                                                                                             | ALTPPVWISTTTTPTTRGSTVTPSSIPGTTHTATVLTITTTTATGSMATPSSSTQTSQTGTPSLTTATTTATGSTTNPSSTPGTTPPPVLTATTATPAATSNVTVPSSALGTTHTPPVPNTMATTHG                               |
| MUC6         | Q6W4X9     | #1                     | 1786-1907   | 123                                                                                                                                                                                                                             | TSATSSRLPTFTTHSPPTGTTTSSSTGVPVATSFQTTTTPYTPSHPTLLPHTVPSFSTSLVTPSTHTVITHTQMATASASIHSMPTGTIPPPPTTIKATGSTHTAPPMTPTTSGTSQSPS                                      |
|              |            | #2                     | 1868-1953   | 86                                                                                                                                                                                                                              | SIHSMPTGTIPPPPTTIKATGSTHTAPPMTPTTSGTSQSPSSFTAKTSTSLPYHTSSTHHPEVPTSTTNIPTKHTSTGTRTPVAH                                                                         |
| MUC7         | Q8TAX7     | 192-351                | 160         | PPTPSATTQAPSSSAPPE TTAAPPTPATTAPPSSSAPPE TTAAPPTPSATTAPLSSSAPPE TTAAPPTPSATTLDPPSASAPPE<br>TTAAPPTPSATTAPPSSAPPE TTAAPITTPNSSPTLAPDTSET SAAPTHQITTSVTTQITTTTKQPTSAP                                                             |                                                                                                                                                               |
| OVGP1 (MUC9) | Q12889     | 476-564                | 89          | AMTMTSVGHQSMTP GEKALTPVGHQSVTT GQKLTLSVGYQSVTP GEKLTLPVGHQSVTP VSHQSVSPGGTMTMP VHFQETELRQNTVAP                                                                                                                                  |                                                                                                                                                               |
| MUC13        | Q9H3R2     | 30-171                 | 142         | TTETATSGPTVAAADTTETNFE TASTTANTPSFTATS PAPIIETHSSSTIPT PAPIIETHSSSTIPI PTAADSESTTNVNSLA<br>TSDIITASSPNDGLIT MVPSETQSNEMSPPT EDNQSSGPPTGTALLE TSTLNST                                                                            |                                                                                                                                                               |
| MUC17        | Q685J3     | 2181-2329              | 149         | LSTTPVDSTPVTNTEARSPPTSEGTSMPTSPSEGSTPFTSMVPVSTMPVVTSEAST LSATPVDSTPVTSTEATSSPTTAEGTSIPTSTLSEGTTPLTSPVSHTLVANSEVST<br>LSTTPVDSNTPFTTSTEASSPPTAEGTSMP                                                                             |                                                                                                                                                               |
| MUC19        | Q7Z5P9     | 3353-3501              | 149         | VTRTRSSA GLTGKGLSA GVTGKGLSA EVTGTRLSA GVTGTTGPPS GVTGTTGTPA GVTGTTGLSA GVTGKGLSS<br>EVTETGLSY GVKRTIGLSA GSTGTSGQSA GVAGTTTLSA EVTGTRPSA GVTGTTGLSA EVTEITGISA                                                                 |                                                                                                                                                               |
| MUC20        | Q8N307     | 175-325                | 151         | ESSASSDSPHPVITPSRA SESSASSDGHHPVITPSRA SESSASSDGHHPVITPSRA SESSASSDGHHPVITPSRA<br>SESSASSDGHHPVITPSRA SESSASSDGHHPVITPSRA SESSASSDGHHPVITPSRA SESSASSDGHHPVITPSRA                                                               |                                                                                                                                                               |
| MUC21        | Q555G8     | 130-278                | 149         | SGASTATNSDSSTT SSGASTATNSDSSTT SSEASTATNSESSTT SSGASTATNSESSTV SSRASTATNSESSTT<br>SSGASTATNSESRTT SNGAGATNSESSTT SSGASTATNSESSTP SSGAGATNSESSTT SSGAGATNSESSTV                                                                  |                                                                                                                                                               |
| MUC22        | E2RYF6     | 336-483                | 148         | GTTTASAMG SETTVSTAG SETTVSITG TETTMVSAMG SETTNSTTS SETTVSTAG SETTVSTAG SETTVSTAG SETTVSTAG SETTVSTAG SETTVSTAG<br>SETTAASTTG SEMTTVFTAG SETITPSTAG SETTVSTAG SETTVSTAG SETTVSTAG SETTVSTAG SETTVSTAG SETTVSTAG SETTVSTAG        |                                                                                                                                                               |
| GP1BA        | P07359     | 281-499                | 219         | PTLGDGDDTLDYDYPEEDTEGDKVRATRTVVKFPTKAHTTPWGLFYSWSTASLDSQMPSSLHPTQESTKEQTTFPWRWTPNFTLHMESIT FSKTPKSTTEPTP SPTTSEPVEPAP NMTTLEPTP SPTTPEPTSEAP<br>SPTTPEPTSEAP SPTTPEPTSEAP SPTTPEPTPIPI ATSPILVSAATSLITPKSTLTTTKPVSLLESTKKTIPELD |                                                                                                                                                               |
| Ctrl         | -          | -                      | 67          | PAEAAATPAPAK AEAAATPAPAK AEAAATPAPAK AEAAATPAPAK AEAAATPAPAK AEAAATPAPAK                                                                                                                                                        |                                                                                                                                                               |

**Supplementary Table 2.** Summary of engineered HEK293 isogenic cell library generated to date, related to **Figure 1**.

| HEK293<br>engineered cells                      |            | In-dels#1                                                                                         | In-dels#2  | In-dels#3                                                                                          | In-dels#4  | In-dels#5                                                                                          | In-dels#6  |                                                                                                    |         |                                                                |         |                                                                                                |
|-------------------------------------------------|------------|---------------------------------------------------------------------------------------------------|------------|----------------------------------------------------------------------------------------------------|------------|----------------------------------------------------------------------------------------------------|------------|----------------------------------------------------------------------------------------------------|---------|----------------------------------------------------------------|---------|------------------------------------------------------------------------------------------------|
| ΔCOSMC<br>(Tn)                                  | Cosmc      | WT :ATAGAATGCA ccaCCAT-GAGCAT<br>+1 :ATAGAATGCA ccaCCATGGAGCAT                                    |            |                                                                                                    |            |                                                                                                    |            |                                                                                                    |         |                                                                |         |                                                                                                |
| ΔC1GALT1<br>(Tn)                                | C1GALT1    | WT :GGCTACAT-GAG tggAGGAGCAGGA<br>+1 :GGCTACATGGAGtggAGGAGCAGGA                                   |            |                                                                                                    |            |                                                                                                    |            |                                                                                                    |         |                                                                |         |                                                                                                |
| ΔGCNT1<br>(ΔCore2)                              | GCNT1      | WT :TAAAAAGCGC cctCGG-TGGACAC<br>-5 :TAAAAAGCGC c-----TGGACAC<br>+1 :TAAAAAGCGC cctCGGTGGACAC     |            |                                                                                                    |            |                                                                                                    |            |                                                                                                    |         |                                                                |         |                                                                                                |
| ΔCOSMC<br>KI B3GnT6<br>(Core3)                  | B3GNT6     | Target KI confirmed<br>by Junction PCR                                                            | Cosmc      | WT :ATAGAATGCA ccaCCAT-GAGCAT<br>+1 :ATAGAATGCA ccaCCATGGAGCAT                                     |            |                                                                                                    |            |                                                                                                    |         |                                                                |         |                                                                                                |
| ΔCOSMC<br>KI ST6GalNAc1<br>(STn)                | ST6GALNAc1 | Target KI confirmed<br>by Junction PCR                                                            | Cosmc      | WT :ATAGAATGCA ccaCCAT-GAGCAT<br>+1 :ATAGAATGCA ccaCCATGGAGCAT                                     |            |                                                                                                    |            |                                                                                                    |         |                                                                |         |                                                                                                |
| ΔST3GAL1/2<br>ΔGCNT1<br>(mSTb)                  | ST3GAL1    | WT :GATCCTGGTG cctTTC--AAGACCA<br>+1 :GATCCTGGTG cctTTC-AAAGACCA<br>+2 :GATCCTGGTG cctTTCAAAGACCA | ST3GAL2    | WT :GATGCCGGTG cctCCG-ACTGGTT<br>-2 :GATGCCGGTG cctCCGA--TGTT<br>+1 :GATGCCGGTG cctCCGAACCTGGTT    | GCNT1      | WT :TAAAAAGCGC cctCGG-TGGACAC<br>-5 :TAAAAAGCGC c-----TGGACAC<br>+1 :TAAAAAGCGC cctCGGTGGACAC      |            |                                                                                                    |         |                                                                |         |                                                                                                |
| ΔGCNT1<br>ΔST6GALNAc2/3/4<br>(mSTa)             | GCNT1      | WT :TAAAAAGCGC cctCGG-TGGACAC<br>-5 :TAAAAAGCGC c-----TGGACAC<br>+1 :TAAAAAGCGC cctCGGTGGACAC     | ST6GALNAc2 | WT :CAACACAAG cccCGTA-TGGCTG<br>+1 :CAACACAAG cccCGTAATGGCTG                                       | ST6GALNAc3 | WT :TACAGCGGGC cctTTC-GAACTCA<br>+1 :TACAGCGGGC cctTTCGAACTCA<br>+1 :TACAGCGGGC cctTTCGAACTCA      | ST6GALNAc4 | WT :CAGCGCAGCA cctTGCG-TGTCGT<br>+1 :CAGCGCAGCA cctTGCGTGTCGT                                      |         |                                                                |         |                                                                                                |
| ΔGCNT1<br>ΔST6GALNAc2/3/4<br>ΔST3GAL1/2 (Core1) | GCNT1      | WT :TAAAAAGCGC cctCGG-TGGACAC<br>-5 :TAAAAAGCGC c-----TGGACAC<br>+1 :TAAAAAGCGC cctCGGTGGACAC     | ST6GALNAc2 | WT :CAACACAAG cccCGTA-TGGCTG<br>+1 :CAACACAAG cccCGTAATGGCTG                                       | ST6GALNAc3 | WT :TACAGCGGGC cctTTC-GAACTCA<br>+1 :TACAGCGGGC cctTTCGAACTCA<br>+1 :TACAGCGGGC cctTTCGAACTCA      | ST6GALNAc4 | WT :CAGCGCAGCA cctTGCG-TGTCGT<br>+1 :CAGCGCAGCA cctTGCGTGTCGT                                      | ST3GAL1 | WT :GATCCTGGTG cctTTC-AAGACCA<br>+1 :GATCCTGGTG cctTTCAAAGACCA | ST3GAL2 | WT :GATGCCGGTG cctCCG-ACTGGTT<br>-4 :GATGCCGGTG cctCCGA--GTT<br>+1 :GATGCCGGTG cctCCGAACCTGGTT |
| ΔGALNT4                                         | GALNT4     | WT :TATATC-TTCG tggAGCTCTTGGT<br>+1 :TATATC TTCGtggAGCTCTTGGT                                     |            |                                                                                                    |            |                                                                                                    |            |                                                                                                    |         |                                                                |         |                                                                                                |
| ΔGALNT7/10                                      | GALNT7     | WT :ACAGATTCAAA cctGTGGTACCAT<br>-1 :ACAGATTCAAA cctGTG-TACCAT                                    | GALNT10    | WT :GAAGACCTTA cccCATG-ACCGATG<br>+1 :GAAGACCTTA cccCATGACCGATG                                    |            |                                                                                                    |            |                                                                                                    |         |                                                                |         |                                                                                                |
| ΔGALNT1/2/3                                     | GALNT1     | WT :TTCCTGGATG cctATT-GTGAGTGTA<br>-8 :TTCCTGGATG cctATT-----A<br>+1 :TTCCTGGATG cctATTGTGAGTGTA  | GALNT2     | WT :CTGCCGCCA ccaGCG--TGTTGATC<br>+2 :CTGCCGCCA ccaGCGGTGGTGTATC<br>-1 :CTGCCGCCA ccaG-G--TGTTGATC | GALNT3     | WT :ACCATAACCG tggAAA-TTTTGACT<br>+1 :ACCATAACCG tggAAAATTTTGACT<br>-1 :ACCATAACCG tggAAA--TTTGACT |            |                                                                                                    |         |                                                                |         |                                                                                                |
| ΔCosmc, GALNT4                                  | Cosmc      | WT :ATAGAATGCA ccaCCAT-GAGCAT<br>+1 :ATAGAATGCA ccaCCATGGAGCAT                                    | GALNT4     | WT :TATATC-TTCG tggAGCTCTTGGT<br>+1 :TATATC TTCGtggAGCTCTTGGT                                      |            |                                                                                                    |            |                                                                                                    |         |                                                                |         |                                                                                                |
| ΔCosmc, GALNT7/10                               | C1GALT1    | WT :GGCTACAT-GAG tggAGGAGCAGGA<br>+1 :GGCTACATGGAGtggAGGAGCAGGA                                   | GALNT7     | WT :TGGACTAGCT cctGGGG-AGGACA<br>+1 :TGGACTAGCT cctGGGGAAGGACA<br>-2 :TGGACTAGCT --TGGGG-AGGACA    | GALNT10    | WT :GAAGACCTTA cccCATG-ACCGATG<br>+1 :GAAGACCTTA cccCATGACCGATG                                    |            |                                                                                                    |         |                                                                |         |                                                                                                |
| ΔC1GALT1<br>ΔGALNT1/2/3                         | C1GALT1    | WT :GGCTACAT-GAG tggAGGAGCAGGA<br>+1 :GGCTACATGGAGtggAGGAGCAGGA<br>+1 :GGCTACATGGAGtggAGGAGCAGGA  | GALNT1     | WT :TTCCTGGATG cctATT-GTGAGTGTA<br>-8 :TTCCTGGATG cctATT-----A<br>+1 :TTCCTGGATG cctATTGTGAGTGTA   | GALNT2     | WT :CTGCCGCCA ccaGCG--TGTTGATC<br>+2 :CTGCCGCCA ccaGCGGTGGTGTATC<br>-1 :CTGCCGCCA ccaG-G--TGTTGATC | GALNT3     | WT :ACCATAACCG tggAAA-TTTTGACT<br>+1 :ACCATAACCG tggAAAATTTTGACT<br>-1 :ACCATAACCG tggAAA--TTTGACT |         |                                                                |         |                                                                                                |

Note: Nucleic acids in **RED** are the insertion or deletion  
Nucleic acids in **Blue** are the PAM sequence

**Supplementary Table 3.** List of CRISPR gRNA design and PCR primers used in this study.

| <b>Gene</b> | <b>gRNA</b>          | <b>Forward primer (5'-3')</b> | <b>Reverse primer (5'-3')</b> |
|-------------|----------------------|-------------------------------|-------------------------------|
| Cosmc       | GTAGGTGATGATGCTCATGG | TGAAGGGTGTGATGCTTGGAA         | ACTGCAGCCCAAAGACTCAC          |
| C1GALT1     | GTAAAGCAGGGCTACATGAG | CCTGCTGTGGGACTGAAAAC          | TGCATCTCCCCAGTGCTAAG          |
| GCNT1       | TAGTCGTCAGGTGTCCACCG | GACACTTGGAGCTTGCTGG           | GGCATATAGATGGCCCTCAGC         |
| ST3GAL1     | TCCAAGTCGATGGTCTTGAA | GTGCCCGTGCTACAAGACTC          | AGTTGGAGTAGTCGGGGAGG          |
| ST3GAL2     | GTGGCTGTCAAACCAGTCGG | TGCCAGAATAGGCAGGCTAC          | TGTTACCGTCAAAGTGGCTG          |
| ST6GALNAC2  | GAGCCCCGCCAGCCATACG  | CTCAGCCCTCACCTTCTCAC          | ATCACCAGTGCTATGAGGGC          |
| ST6GALNAC3  | GTATCCATAGTGAGTTCGAA | TCCTTCTGTGACTGCCTTTGG         | TTCAGTGAGTTGGAAGCCCTC         |
| ST6GALNAC4  | TGTGTGTGAGACGACACGCA | CTCTCTGTCTCTTCTCCCTGC         | GGGCCTTCTGGAAGTAGTGTG         |
| GALNT1      | TCCCACTGTACTACTACAAT | GAATAGTGCCAGGCCACACT          | AAAGCAAACCTGGGAGGAAAT         |
| GALNT2      | GTGAAACGTGATCACCACGC | CCATCCCAGTTGGTCAGTCT          | CTGTGCTGAGCAGTCAGGAG          |
| GALNT3      | TATGGAAGTAACCATAACCG | TCCCTCCAGGTGAGTGTTC           | AAAGCAAACAGTGTGTACATATCAA     |
| GALNT4      | AACAGTGGCCTATATCTTCG | CTGCTGGAAGTACCTGAGC           | TCCTCGTTGAGCTGGAGTTT          |
| GALNT7      | ATGCCCAACCGAGGCGGCAA | TTAATGGCCCGCTTGTATTC          | CGAAGCACAGGATCATGGTA          |
| GALNT10     | CTCTCTCAGCATCGGTCATG | GCTTGCTCCCTCCTACTCT           | ACAACAGCCAGGAAACATC           |



**Supplementary Table 4.** A peak list of intact mass spectra experimentally determined (MW ex) and theoretically calculated (MW cal) masses related Figure 2a.

| MUC1 KO <i>C1GALT1</i> |         |         | MUC1 KO <i>GCNT1</i> , KO <i>ST3GAL1/2</i> |         |         | MUC1 KO <i>GCNT1</i> , KO <i>ST3GAL1/2</i> |         |         | MUC1 KO <i>GCNT1</i> |         |         |
|------------------------|---------|---------|--------------------------------------------|---------|---------|--------------------------------------------|---------|---------|----------------------|---------|---------|
| Number of HexNAc       | MW ex   | MW cal  | Number of HexNAc                           | MW ex   | MW cal  | Number of HexNAc                           | MW ex   | MW cal  | Number of HexNAc     | MW ex   | MW cal  |
| 28*                    | 20607.7 | 20607.5 | 18                                         | 18560.1 | 18559.6 | 28                                         | 25132.5 | 25131.5 | 27                   | 24766.1 | 24766.1 |
| 29*                    | 20810.6 | 20810.7 | 19                                         | 18764.0 | 18762.8 | 29                                         | 25497.8 | 25496.8 | 28                   | 25130.9 | 25131.5 |
| 30*                    | 21013.8 | 21013.9 | 20                                         | 18966.9 | 18966.0 | 30                                         | 25861.9 | 25862.1 | 29                   | 25497.2 | 25496.8 |
| 31*                    | 21217.2 | 21217.1 | 21                                         | 19170.1 | 19169.2 | 31                                         | 26228.3 | 26227.5 | 30                   | 25861.5 | 25862.1 |
| 32*                    | 21420.5 | 21420.3 | 22                                         | 19372.5 | 19372.4 | 32                                         | 26593.6 | 26592.8 | 31                   | 26227.7 | 26227.5 |
| 33*                    | 21623.3 | 21623.5 | 23                                         | 19575.8 | 19575.6 | 33                                         | 26958.8 | 26958.1 | 32                   | 26592.9 | 26592.8 |
| 34*                    | 21826.7 | 21826.7 | 24                                         | 19779.0 | 19778.8 | 34                                         | 27323.9 | 27323.5 | 33                   | 26958.3 | 26958.1 |
| 35*                    | 22030.2 | 22029.9 | 25                                         | 19982.0 | 19982.0 | 35                                         | 27689.6 | 27688.8 | 34                   | 27323.5 | 27323.5 |
|                        |         |         | 26                                         | 20185.5 | 20185.1 | 36                                         | 28054.8 | 28054.1 |                      |         |         |
|                        |         |         | 27                                         | 20388.9 | 20388.3 |                                            |         |         |                      |         |         |
|                        |         |         | 28                                         | 20592.8 | 20591.5 |                                            |         |         |                      |         |         |
|                        |         |         | 29                                         | 20795.9 | 20794.7 |                                            |         |         |                      |         |         |
|                        |         |         | 30                                         | 20999.0 | 20997.9 |                                            |         |         |                      |         |         |
|                        |         |         | 31                                         | 21201.1 | 21201.1 |                                            |         |         |                      |         |         |
|                        |         |         | 32                                         | 21404.4 | 21404.3 |                                            |         |         |                      |         |         |
|                        |         |         | 33                                         | 21607.7 | 21607.5 |                                            |         |         |                      |         |         |
|                        |         |         | 34                                         | 21810.8 | 21810.7 |                                            |         |         |                      |         |         |
|                        |         |         | 35                                         | 22014.7 | 22013.9 |                                            |         |         |                      |         |         |

\*) Oxidated

**Supplementary Table 5.** A peak list of intact mass spectra experimentally determined (MW ex) and theoretically calculated (MW cal) masses related Figure 3.

| MUC2#1 KO <i>C1GALT1</i> |         |         | MUC2#2 KO <i>C1GALT1</i> |         |         | MUC5 KO <i>C1GALT1</i> |         |         | MUC7 KO <i>C1GALT1</i> |         |         | MUC13 KO <i>C1GALT1</i> |         |         | MUC22 KO <i>C1GALT1</i> |         |         |
|--------------------------|---------|---------|--------------------------|---------|---------|------------------------|---------|---------|------------------------|---------|---------|-------------------------|---------|---------|-------------------------|---------|---------|
| Number of HexNAc         | MW ex   | MW cal  | Number of HexNAc         | MW ex   | MW cal  | Number of HexNAc       | MW ex   | MW cal  | Number of HexNAc       | MW ex   | MW cal  | Number of HexNAc        | MW ex   | MW cal  | Number of HexNAc        | MW ex   | MW cal  |
| 73                       | 31256.8 | 31257.2 | 85                       | 34024.5 | 34023.8 | 97                     | 35167.3 | 35166.0 | 57                     | 28932.8 | 28932.7 | 48**                    | 25792.1 | 25790.4 | 59**                    | 28071.1 | 28071.2 |
| 76                       | 31866.0 | 31866.7 | 86                       | 34227.5 | 34227.0 | 98                     | 35370.3 | 35369.2 | 58                     | 29135.0 | 29135.9 | 49**                    | 25995.2 | 25993.6 | 63**                    | 28884.3 | 28883.9 |
| 77                       | 32069.7 | 32069.9 | 87                       | 34430.7 | 34430.2 | 99                     | 35573.7 | 35572.4 | 59                     | 29338.4 | 29339.1 | 50**                    | 26198.3 | 26196.8 | 68***                   | 29918.0 | 29915.9 |
| 78                       | 32272.6 | 32273.1 | 88                       | 34633.7 | 34633.4 | 100                    | 35776.8 | 35775.6 | 60                     | 29541.7 | 29542.3 | 51**                    | 26401.3 | 26400.0 | 69***                   | 30121.0 | 30119.1 |
| 79                       | 32476.0 | 32476.3 | 89                       | 34836.7 | 34836.6 | 101                    | 35979.9 | 35978.8 | 61                     | 29745.0 | 29745.5 | 52**                    | 26604.3 | 26603.2 | 70***                   | 30324.2 | 30322.3 |
| 80*                      | 32696.8 | 32695.5 | 90                       | 35039.9 | 35039.8 | 102                    | 36182.8 | 36182.0 | 62                     | 29948.2 | 29948.6 | 53**                    | 26807.3 | 26806.4 | 71***                   | 30527.2 | 30525.5 |
| 81*                      | 32900.0 | 32898.7 |                          |         |         | 103                    | 36385.6 | 36385.1 | 63                     | 30151.7 | 30151.8 | 54**                    | 27010.7 | 27009.6 | 72***                   | 30729.7 | 30728.7 |
| 82*                      | 33103.0 | 33101.9 |                          |         |         | 104                    | 36589.2 | 36588.3 | 64                     | 30354.9 | 30355.0 | 55**                    | 27213.3 | 27212.8 | 73***                   | 30933.3 | 30931.9 |
| 83*                      | 33306.2 | 33305.1 |                          |         |         | 105                    | 36791.9 | 36791.5 | 65                     | 30558.3 | 30558.2 |                         |         |         | 74***                   | 31136.3 | 31135.0 |
| 84*                      | 33509.3 | 33508.3 |                          |         |         |                        |         |         | 66                     | 30761.1 | 30761.4 |                         |         |         | 75***                   | 31339.8 | 31338.2 |
| 85*                      | 33712.9 | 33711.5 |                          |         |         |                        |         |         | 67                     | 30964.7 | 30964.6 |                         |         |         |                         |         |         |
| 86*                      | 33915.7 | 33914.7 |                          |         |         |                        |         |         |                        |         |         |                         |         |         |                         |         |         |

\*) Oxidated

\*\*) Deamidated after PNGaseF treatment (1xN-glyco site)

\*\*\*) Deamidated after PNGaseF treatment (1xN-glyco site)+Oxidation

**Supplementary Table 6.** A peak list of intact mass spectra experimentally determined (MW ex) and theoretically calculated (MW cal) masses related Supplementary Figure 7a.

| MUC1 KO C1GALT1  |         |         | MUC1 KO C1GALT1/GALNT4 |         |         |
|------------------|---------|---------|------------------------|---------|---------|
| Number of HexNAc | MW ex   | MW cal  | Number of HexNAc       | MW ex   | MW cal  |
| 28*              | 20607.7 | 20607.5 | 22                     | 19372.3 | 19372.4 |
| 29*              | 20810.6 | 20810.7 | 23                     | 19575.2 | 19575.6 |
| 30*              | 21013.8 | 21013.9 | 23*                    | 19592.1 | 19591.6 |
| 31*              | 21217.2 | 21217.1 | 24                     | 19778.9 | 19778.8 |
| 32*              | 21420.5 | 21420.3 | 24*                    | 19794.7 | 19794.8 |
| 33*              | 21623.3 | 21623.5 | 25                     | 19981.6 | 19982.0 |
| 34*              | 21826.7 | 21826.7 | 25*                    | 19998.1 | 19998.0 |
| 35*              | 22030.2 | 22029.9 | 26                     | 20185.0 | 20185.2 |
|                  |         |         | 26*                    | 20201.6 | 20201.1 |
|                  |         |         | 27                     | 20388.3 | 20388.3 |
|                  |         |         | 27*                    | 20404.1 | 20404.3 |
|                  |         |         | 28                     | 20591.3 | 20591.5 |
|                  |         |         | 28*                    | 20607.4 | 20607.5 |
|                  |         |         | 29                     | 20795.2 | 20794.7 |
|                  |         |         | 29*                    | 20810.9 | 20810.7 |
|                  |         |         | 30                     | 20997.5 | 20997.9 |
|                  |         |         | 30*                    | 21014.3 | 21013.9 |

\*) Oxidated

\*\*) Deamidated after PNGaseF treatment (1xN-glyco site)

\*\*\*) Deamidated after PNGaseF treatment (1xN-glyco site)+Oxidation
