# Supplementary material for: Display of the human mucinome with defined O-glycans by gene engineered cells
Source: PubMed Central journal article supplement (PMC8249670; doi:10.1038/s41467-021-24366-4), 2021-07-01
Supplement: 41467_2021_24366_MOESM3_ESM.pdf [file 41467_2021_24366_MOESM3_ESM.pdf]

## Reporting Summary

Nature Research wishes to improve the reproducibility of the work that we publish. This form provides structure for consistency and transparency in reporting. For further information on Nature Research policies, see our [Editorial Policies](#) and the [Editorial Policy Checklist](#).

### Statistics

For all statistical analyses, confirm that the following items are present in the figure legend, table legend, main text, or Methods section.

- |                                     |                                                                                                                                                                                                                                                                                                |
|-------------------------------------|------------------------------------------------------------------------------------------------------------------------------------------------------------------------------------------------------------------------------------------------------------------------------------------------|
| n/a                                 | Confirmed                                                                                                                                                                                                                                                                                      |
| <input type="checkbox"/>            | <input checked="" type="checkbox"/> The exact sample size ( $n$ ) for each experimental group/condition, given as a discrete number and unit of measurement                                                                                                                                    |
| <input type="checkbox"/>            | <input checked="" type="checkbox"/> A statement on whether measurements were taken from distinct samples or whether the same sample was measured repeatedly                                                                                                                                    |
| <input checked="" type="checkbox"/> | <input type="checkbox"/> The statistical test(s) used AND whether they are one- or two-sided<br><i>Only common tests should be described solely by name; describe more complex techniques in the Methods section.</i>                                                                          |
| <input checked="" type="checkbox"/> | <input type="checkbox"/> A description of all covariates tested                                                                                                                                                                                                                                |
| <input checked="" type="checkbox"/> | <input type="checkbox"/> A description of any assumptions or corrections, such as tests of normality and adjustment for multiple comparisons                                                                                                                                                   |
| <input type="checkbox"/>            | <input checked="" type="checkbox"/> A full description of the statistical parameters including central tendency (e.g. means) or other basic estimates (e.g. regression coefficient) AND variation (e.g. standard deviation) or associated estimates of uncertainty (e.g. confidence intervals) |
| <input checked="" type="checkbox"/> | <input type="checkbox"/> For null hypothesis testing, the test statistic (e.g. $F$ , $t$ , $r$ ) with confidence intervals, effect sizes, degrees of freedom and $P$ value noted<br><i>Give <math>P</math> values as exact values whenever suitable.</i>                                       |
| <input checked="" type="checkbox"/> | <input type="checkbox"/> For Bayesian analysis, information on the choice of priors and Markov chain Monte Carlo settings                                                                                                                                                                      |
| <input checked="" type="checkbox"/> | <input type="checkbox"/> For hierarchical and complex designs, identification of the appropriate level for tests and full reporting of outcomes                                                                                                                                                |
| <input checked="" type="checkbox"/> | <input type="checkbox"/> Estimates of effect sizes (e.g. Cohen's $d$ , Pearson's $r$ ), indicating how they were calculated                                                                                                                                                                    |

*Our web collection on [statistics for biologists](#) contains articles on many of the points above.*

### Software and code

Policy information about [availability of computer code](#)

|                 |                                                                                                                                                                                                                                                                                                                                                                                                                                                                                                                                             |
|-----------------|---------------------------------------------------------------------------------------------------------------------------------------------------------------------------------------------------------------------------------------------------------------------------------------------------------------------------------------------------------------------------------------------------------------------------------------------------------------------------------------------------------------------------------------------|
| Data collection | HPLC data were collected with Empower 3 Chromatography Data Software (Waters), in which data analysis was also performed. In flow cytometry experiments, we have employed the Sony SONY SA3800 software for data collection. For immunohistochemistry a Zeiss microscopic system was used and protein gels were imaged with an ImageQuant LAS 4000 system (GE Healthcare). Mass spectrometry experiments were collected with OrbiTrap Fusion/Lumos (Thermo) and Autoflex (Bruker).                                                          |
| Data analysis   | We used Chromeleon™ 6.8 Chromatography Data System Software (Thermo) for HPLC data analysis, FlowJo X 10.0.7r2 for flow cytometry, ImageJ (NIH) Version 2.1.0/1.53c for immunohistochemistry and ImageQuant software (GE Healthcare) for protein gels, FlexAnalysis (Bruker), BioPharma Finder Verison 3.2/4.0 (demo) (Thermo), and SysBioWare software.(Vakhrushev, S., Dadimov, D. & Peter-Katalinic, J. Software platform for high-throughput glycomics. Analytical chemistry 81, 3252-3260 (2009)) for mass spectrometry data analysis. |

For manuscripts utilizing custom algorithms or software that are central to the research but not yet described in published literature, software must be made available to editors and reviewers. We strongly encourage code deposition in a community repository (e.g. GitHub). See the Nature Research [guidelines for submitting code & software](#) for further information.

### Data

Policy information about [availability of data](#)

All manuscripts must include a [data availability statement](#). This statement should provide the following information, where applicable:

- Accession codes, unique identifiers, or web links for publicly available datasets
- A list of figures that have associated raw data
- A description of any restrictions on data availability

All data generated or analyzed during this study are included in this article and supplementary information files. The mass spectrometry proteomics data has been deposited to the ProteomeXchange Consortium via the PRIDE repository with the dataset identifier PXD024851 [<https://www.ebi.ac.uk/pride/archive/projects/>]

PXD024851]. The source data underlying Figures 4a, 5b-d, 6b-e, 7 and Supplementary Figures 2, 4, 5a-c, 8, 9 and 10a are provided as a Source Data file.

## Field-specific reporting

Please select the one below that is the best fit for your research. If you are not sure, read the appropriate sections before making your selection.

Life sciences  Behavioural & social sciences  Ecological, evolutionary & environmental sciences

For a reference copy of the document with all sections, see [nature.com/documents/nr-reporting-summary-flat.pdf](https://www.nature.com/documents/nr-reporting-summary-flat.pdf)

## Life sciences study design

All studies must disclose on these points even when the disclosure is negative.

|                 |                                                                                                                                                                                                                                                                                                                                                                                                                                                                                                                                                                                                                                                                                                                                                                                                                                               |
|-----------------|-----------------------------------------------------------------------------------------------------------------------------------------------------------------------------------------------------------------------------------------------------------------------------------------------------------------------------------------------------------------------------------------------------------------------------------------------------------------------------------------------------------------------------------------------------------------------------------------------------------------------------------------------------------------------------------------------------------------------------------------------------------------------------------------------------------------------------------------------|
| Sample size     | Sample size was chosen based on experience of the investigators with similar experiments conducted multiple times and previously published.                                                                                                                                                                                                                                                                                                                                                                                                                                                                                                                                                                                                                                                                                                   |
| Data exclusions | No data was excluded from the manuscript.                                                                                                                                                                                                                                                                                                                                                                                                                                                                                                                                                                                                                                                                                                                                                                                                     |
| Replication     | FACS analysis of protein binding to engineered HEK293 cell clones were performed multiple times (2-3) and with multiple clones per same gene engineering event (2-3). FACS data shown represents average of 2-3 independent experiments at a single concentration. All attempts at replication were successful.<br>SDS page analysis of purified mucin reporters were carried out 2-3 times with similar results.<br>For mucin cleavage assays different concentrations of the glycopeptidase StcE and mutant constructs were used and the SDS page gels were run 2x with similar results.<br>Immunohistochemistry was performed independently 2 times with fresh tissue samples with similar results.<br>ELISA assays were performed with antigen titrations (6-12), and the binding of select lectins and antibodies were repeated 2 times. |
| Randomization   | Not applicable, but for cell binding assays in Fig. 3 KO clones with the same genetic engineering were randomly selected from available number of clones. No group allocation was performed, randomization is irrelevant to our study.                                                                                                                                                                                                                                                                                                                                                                                                                                                                                                                                                                                                        |
| Blinding        | No group allocation was performed, blinding is irrelevant to our study since there is no selection bias during the experiments or data collection.                                                                                                                                                                                                                                                                                                                                                                                                                                                                                                                                                                                                                                                                                            |

## Reporting for specific materials, systems and methods

We require information from authors about some types of materials, experimental systems and methods used in many studies. Here, indicate whether each material, system or method listed is relevant to your study. If you are not sure if a list item applies to your research, read the appropriate section before selecting a response.

### Materials & experimental systems

| n/a                                 | Involved in the study                                     |
|-------------------------------------|-----------------------------------------------------------|
| <input type="checkbox"/>            | <input checked="" type="checkbox"/> Antibodies            |
| <input type="checkbox"/>            | <input checked="" type="checkbox"/> Eukaryotic cell lines |
| <input checked="" type="checkbox"/> | <input type="checkbox"/> Palaeontology and archaeology    |
| <input checked="" type="checkbox"/> | <input type="checkbox"/> Animals and other organisms      |
| <input checked="" type="checkbox"/> | <input type="checkbox"/> Human research participants      |
| <input checked="" type="checkbox"/> | <input type="checkbox"/> Clinical data                    |
| <input checked="" type="checkbox"/> | <input type="checkbox"/> Dual use research of concern     |

### Methods

| n/a                                 | Involved in the study                              |
|-------------------------------------|----------------------------------------------------|
| <input checked="" type="checkbox"/> | <input type="checkbox"/> ChIP-seq                  |
| <input type="checkbox"/>            | <input checked="" type="checkbox"/> Flow cytometry |
| <input checked="" type="checkbox"/> | <input type="checkbox"/> MRI-based neuroimaging    |

## Antibodies

Antibodies used

Commercial Primary Antibodies used:  
APC- conjugated anit-FLAG (Biolegend) Cat: 637308 Clone: L5  
mouse anti-6xHis antibody (R&D Systems) Cat:IC0501R-100UG  
rabbit anti-GST (Invitrogen by Thermo Fisher) Cat: A-5800  
Cy™3 AffiniPure Donkey Anti-Mouse IgG (ImmunoResearch) Cat: AB\_2340813  
Biotinylated PNA, VVA, MAL-II (Vector Lab) Cat: B-1075-5, B-1235, B-1265 respectively.  
SiaFind™ Pan-Specific Lectenz®, Biotinylated Kit (Lectenz Bio) Cat: SK0501B  
Goat anit- mouse IgG, Alexa Flour 647 (Invitrogen by Thermo Fisher) Cat: A21235  
Goat anti-Rabbit IgG, Alexa Flour 647 (Invitrogen by Thermo Fisher) Cat: A21245  
Goat anti-mouse IgG, Alexa Flour 488 (Invitrogen by Thermo Fisher) Cat: A10680

Primary in house monoclonal Antibodies used: anti-Tn (5F4), anti-STn (TKH2), anti-Core1 (3C9), anti-MUC1 (5E10), anti-MUC1 (SM3), anti Tn-MUC1 (5E5), anti-Tn MUC2 (PMH1), anti-Tn MUC1/4 (6E3), anti-Tn MUC4 (3B11), anti-Tn MUC1 (2D9), anti-Core1 MUC1 (1B9), anti-MUC1 (5E10), anti-MUC1 (HMGF1).

## Validation

Commercially purchased antibodies directed against standard protein tags were validated on cell lines transfected with proteins with or without the relevant tag.

APC- conjugated anti-FLAG (Biolegend). Statement on companies website " Each lot of this antibody is quality control tested by intracellular immunofluorescent staining with flow cytometric analysis".

mouse anti-6xHis antibody (R&D Systems) Cat: IC0501R-100UG is validated in Narimatsu et al., Mol Cell. 2019.

abbit anti-GST (Invitrogen by Thermo Fisher) is validated in Narimatsu et al., Mol Cell. 2019.

Biotinylated PNA, VVA, MAL-II (Vector Lab) is validated in Bull et al., PNAS. 2021

SiaFind™ Pan-Specific Lectenz® is validated in Bull et al., PNAS. 2021.

Monoclonal antibodies produced in-house were previously characterized by Steentoft et al., Glycobiology. 2019.

Used batches were validated in-house prior to using on cell lines expressing respective antigens.

## Eukaryotic cell lines

### Policy information about [cell lines](#)

|                                                                      |                                                                                                                                                                                                                                                                                        |
|----------------------------------------------------------------------|----------------------------------------------------------------------------------------------------------------------------------------------------------------------------------------------------------------------------------------------------------------------------------------|
| Cell line source(s)                                                  | HEK293 6E cells (National Research Council, (Canada) were used.                                                                                                                                                                                                                        |
| Authentication                                                       | No specific authentication of cell lines used apart from separate handling of original obtained vials throughout entire project. Each individual engineered HEK293 clones were confirmed multiple times by HEK293 gene specific IDAA and Sanger sequencing in the target gene area(s). |
| Mycoplasma contamination                                             | A representative set of growing cell lines in the lab selected randomly is subjected to mycoplasma screening bi-monthly, and within the last 10 yrs no infected cells have been found..                                                                                                |
| Commonly misidentified lines<br>(See <a href="#">ICLAC</a> register) | None of the cell lines used are listed in the ICLAC database.                                                                                                                                                                                                                          |

## Flow Cytometry

### Plots

Confirm that:

- The axis labels state the marker and fluorochrome used (e.g. CD4-FITC).
- The axis scales are clearly visible. Include numbers along axes only for bottom left plot of group (a 'group' is an analysis of identical markers).
- All plots are contour plots with outliers or pseudocolor plots.
- A numerical value for number of cells or percentage (with statistics) is provided.

### Methodology

|                           |                                                                                                                                                                                                                                                                                                                                                                                                                     |
|---------------------------|---------------------------------------------------------------------------------------------------------------------------------------------------------------------------------------------------------------------------------------------------------------------------------------------------------------------------------------------------------------------------------------------------------------------|
| Sample preparation        | HEK293 cells were suspended in FACS buffer (PBS plus 1% BSA (w/v)) containing biotinylated lectin, mAbs or GST-tagged streptococcal adhesins for 1 h at 4°C in a 96 well plate, followed by washing 2x with FACS buffer and staining with appropriate secondary antibody for 30 minutes at 4°C. After subsequent 2x wash cells were resuspended in FACS buffer and fluorescence intensity was immediately measured. |
| Instrument                | SONY SA3800 Spectral cell analyzer was used for all binding assays.                                                                                                                                                                                                                                                                                                                                                 |
| Software                  | FlowJo Version 10 was used.                                                                                                                                                                                                                                                                                                                                                                                         |
| Cell population abundance | Not applicable. Gating was performed only to exclude dead cells and doublets.                                                                                                                                                                                                                                                                                                                                       |
| Gating strategy           | The dead cells were excluded based on forward and side scatter area (FSC-A and SSC-A) parameter. Doublets were excluded based on FSC-H (height) and FSC-W (width) parameter.                                                                                                                                                                                                                                        |

- Tick this box to confirm that a figure exemplifying the gating strategy is provided in the Supplementary Information.
